# Supplementary material
Source: PubMed Central journal article supplement (PMC6898676)
Supplement: 41386_2019_507_MOESM2_ESM.pdf [file 41386_2019_507_MOESM2_ESM.pdf]

|                          | Reinstatement Test Number |           |           |           |           |           |           |           |
|--------------------------|---------------------------|-----------|-----------|-----------|-----------|-----------|-----------|-----------|
| Reinstatement Type       | VEH1/CNO1                 | VEH2/CNO2 | VEH3/CNO3 | VEH4/CNO4 | VEH5/CNO5 | VEH6/CNO6 | VEH7/CNO7 | VEH8/CNO8 |
| Safe Context + Cue       | 66                        | 66        | 0         | 0         | 0         | 0         | 0         | 0         |
| Safe Context + No Cue    | 0                         | 0         | 34        | 34        | 1         | 1         | 0         | 0         |
| Safe Context + Cocaine   | 0                         | 0         | 31        | 31        | 0         | 0         | 7         | 7         |
| Punishment Context + Cue | 0                         | 0         | 1         | 1         | 34        | 34        | 0         | 0         |

**Supplemental Table 2. Repeated reinstatement testing schedule.** Dark gray column represents reinstatement type and light gray column represents test number. Number of rats tested represented under each condition in white boxes.
