# Supplementary material
Source: PubMed Central journal article supplement (PMC6898676)
Supplement: 41386_2019_507_MOESM4_ESM.pdf [file 41386_2019_507_MOESM4_ESM.pdf]

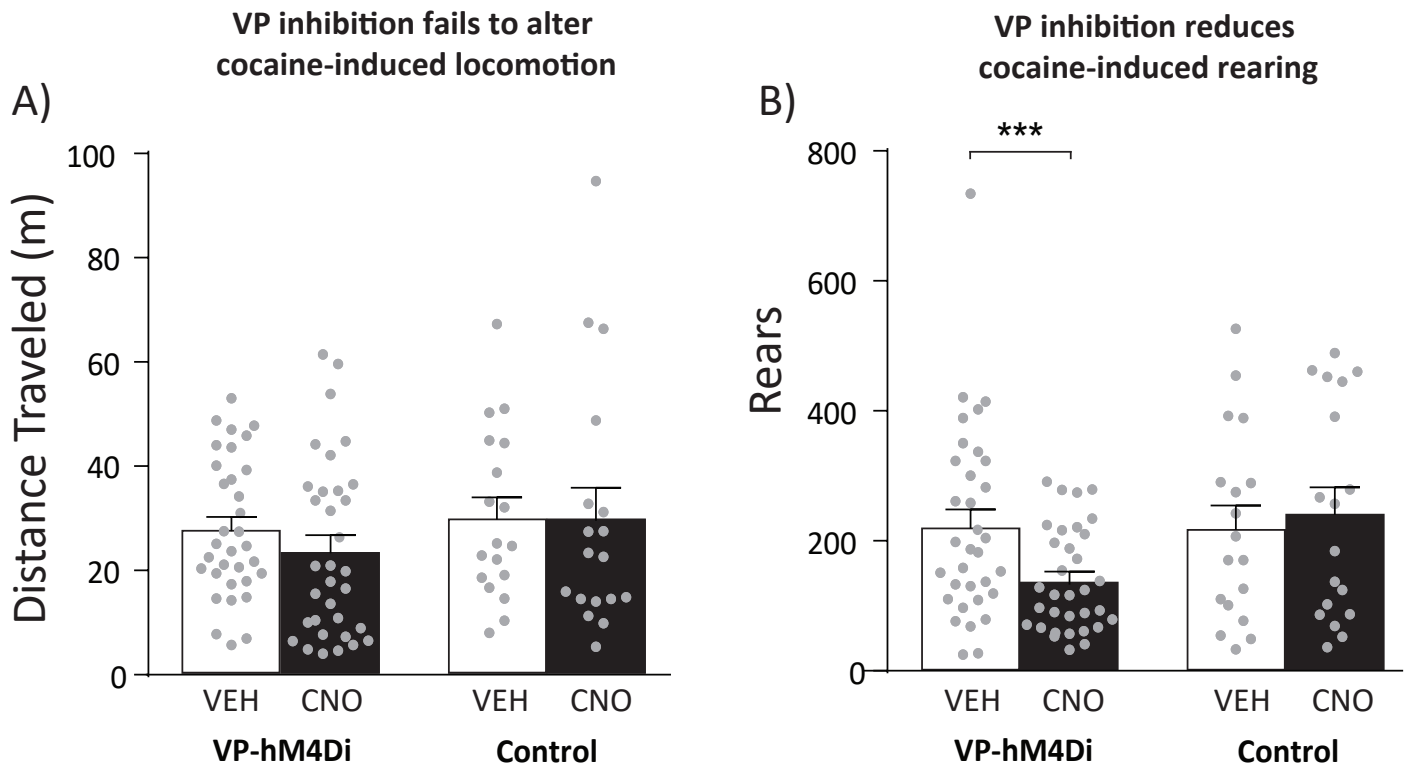

**Supplemental Figure 2. VP inhibition decreases cocaine-induced rearing, but not distance traveled.** **A)** Within subjects tests showed that CNO in VP-hM4Di rats and controls fails to alter cocaine-induced horizontal locomotion. **B)** CNO decreases rearing in VP-hM4Di rats, but not controls. Control = extra-VP hM4Di and eGFP-only rats. \*\*\* $p < 0.001$
